# Supplementary material for: Genomic Analyses Uncover Evolutionary Features of Influenza A/H3N2 Viruses in Yunnan Province, China, from 2017 to 2022
Source: MDPI journal article supplement (doi:10.3390/v16010138), 2024-01-18
Supplement: s1 [file s1]

**Table S3.** Demographic characteristics of the cases infected with influenza viruses in Yunnan Province, China, from 2017 to 2022.

| Classification           |             | Number (%) of the cases infected with influenza viruses |             |             |             |             |              |
|--------------------------|-------------|---------------------------------------------------------|-------------|-------------|-------------|-------------|--------------|
| Year (Total cases)       | 2017 (1340) | 2018 (1142)                                             | 2019 (1350) | 2020 (236)  | 2021 (312)  | 2022 (711)  | Total (5091) |
| <b>Sex</b>               |             |                                                         |             |             |             |             |              |
| female                   | 606 (45.22) | 514 (45.01)                                             | 606 (44.89) | 94 (39.83)  | 128 (41.03) | 299 (42.05) | 2247 (44.14) |
| male                     | 734 (54.78) | 628 (54.99)                                             | 744 (55.11) | 142 (60.17) | 184 (58.97) | 412 (57.95) | 2844 (55.86) |
| <b>Age group (years)</b> |             |                                                         |             |             |             |             |              |
| 0~                       | 408 (30.45) | 320 (28.02)                                             | 343 (25.41) | 104 (44.07) | 29 (9.29)   | 151 (21.24) | 1355 (26.62) |
| 5~                       | 437 (32.61) | 372 (32.57)                                             | 618 (45.78) | 45 (19.07)  | 156 (50)    | 234 (32.91) | 1862 (36.57) |
| 15~                      | 151 (11.27) | 157 (13.75)                                             | 179 (13.26) | 31 (13.14)  | 70 (22.44)  | 176 (24.75) | 764 (15.01)  |
| 25~                      | 289 (21.57) | 249 (21.80)                                             | 189 (14.00) | 43 (18.22)  | 54 (17.31)  | 141 (19.83) | 965 (18.96)  |
| 60~                      | 55 (4.10)   | 44 (3.85)                                               | 21 (1.56)   | 13 (5.51)   | 3 (0.96)    | 9 (1.27)    | 145 (2.85)   |
| <b>Occupation</b>        |             |                                                         |             |             |             |             |              |
| Nursery children         | 401 (29.93) | 328 (28.72)                                             | 357 (26.44) | 60 (25.42)  | 28 (8.97)   | 157 (22.08) | 1331 (26.14) |
| Scattered children       | 161 (12.01) | 132 (11.56)                                             | 132 (9.78)  | 60 (25.42)  | 13 (4.17)   | 47 (6.61)   | 545 (10.71)  |
| Students                 | 353 (26.34) | 327 (28.63)                                             | 552 (40.89) | 39 (16.53)  | 187 (59.94) | 317 (44.59) | 1775 (34.87) |
| Cadre and employees      | 71 (5.30)   | 54 (4.73)                                               | 57 (4.22)   | 10 (4.24)   | 8 (2.56)    | 25 (3.52)   | 225 (4.42)   |
| Workers                  | 35 (2.61)   | 23 (2.01)                                               | 18 (1.33)   | 4 (1.69)    | 6 (1.92)    | 23 (3.23)   | 109 (2.14)   |
| Farmers                  | 83 (6.19)   | 53 (4.64)                                               | 61 (4.52)   | 15 (6.36)   | 3 (0.96)    | 23 (3.23)   | 238 (4.67)   |
| Others                   | 236 (17.61) | 225 (19.70)                                             | 173 (12.81) | 48 (20.34)  | 67 (21.47)  | 119 (16.74) | 868 (17.05)  |
