# Supplementary material for: Genomic Analyses Uncover Evolutionary Features of Influenza A/H3N2 Viruses in Yunnan Province, China, from 2017 to 2022
Source: MDPI journal article supplement (doi:10.3390/v16010138), 2024-01-18
Supplement: s1 [file s1]

**Table S1.** Strain names and accession numbers of eight segments of influenza A/H3N2 viruses isolated in Yunnan Province, China, from 2017 to 2022, and the 22 global reference strains.

| Strain name                    | ID               | PB2        | PB1        | PA         | HA         | NP         | NA         | M          | NS         |
|--------------------------------|------------------|------------|------------|------------|------------|------------|------------|------------|------------|
| A/Yunnan-Guandu/1669/2017      | EPI_ISL_18681104 | EPI2864047 | EPI2864048 | EPI2864046 | EPI2864050 | EPI2864043 | EPI2864049 | EPI2864045 | EPI2864044 |
| A/Yunnan-Dali/1392/2017        | EPI_ISL_18681105 | EPI2864055 | EPI2864056 | EPI2864054 | EPI2864058 | EPI2864051 | EPI2864057 | EPI2864053 | EPI2864052 |
| A/Yunnan-Dali/1395/2017        | EPI_ISL_18681106 | EPI2864063 | EPI2864064 | EPI2864062 | EPI2864066 | EPI2864059 | EPI2864065 | EPI2864061 | EPI2864060 |
| A/Yunnan-Lushui/1893/2017      | EPI_ISL_18681107 | EPI2864071 | EPI2864072 | EPI2864070 | EPI2864074 | EPI2864067 | EPI2864073 | EPI2864069 | EPI2864068 |
| A/Yunnan-Chuxiong/1363/2017    | EPI_ISL_18681108 | EPI2864079 | EPI2864080 | EPI2864078 | EPI2864082 | EPI2864075 | EPI2864081 | EPI2864077 | EPI2864076 |
| A/Yunnan-Xianggelila/1381/2017 | EPI_ISL_18681109 | EPI2864087 | EPI2864088 | EPI2864086 | EPI2864090 | EPI2864083 | EPI2864089 | EPI2864085 | EPI2864084 |
| A/Yunnan-Xishan/1748/2017      | EPI_ISL_18681110 | EPI2864095 | EPI2864096 | EPI2864094 | EPI2864098 | EPI2864091 | EPI2864097 | EPI2864093 | EPI2864092 |
| A/Yunnan-Wenshan/1727/2017     | EPI_ISL_18681111 | EPI2864103 | EPI2864104 | EPI2864102 | EPI2864106 | EPI2864099 | EPI2864105 | EPI2864101 | EPI2864100 |
| A/Yunnan-Wenshan/1863/2017     | EPI_ISL_18681112 | EPI2864111 | EPI2864112 | EPI2864110 | EPI2864114 | EPI2864107 | EPI2864113 | EPI2864109 | EPI2864108 |
| A/Yunnan-Hongta/11239/2017     | EPI_ISL_18681113 | EPI2864119 | EPI2864120 | EPI2864118 | EPI2864122 | EPI2864115 | EPI2864121 | EPI2864117 | EPI2864116 |
| A/Yunnan-Mengzi/1824/2017      | EPI_ISL_18681114 | EPI2864127 | EPI2864128 | EPI2864126 | EPI2864130 | EPI2864123 | EPI2864129 | EPI2864125 | EPI2864124 |
| A/Yunnan-Linxiang/11042/2017   | EPI_ISL_18681115 | EPI2864135 | EPI2864136 | EPI2864134 | EPI2864138 | EPI2864131 | EPI2864137 | EPI2864133 | EPI2864132 |
| A/Yunnan-Xianggelila/1728/2017 | EPI_ISL_18681116 | EPI2864143 | EPI2864144 | EPI2864142 | EPI2864146 | EPI2864139 | EPI2864145 | EPI2864141 | EPI2864140 |
| A/Yunnan-Simao/1948/2017       | EPI_ISL_18681117 | EPI2864151 | EPI2864152 | EPI2864150 | EPI2864154 | EPI2864147 | EPI2864153 | EPI2864149 | EPI2864148 |
| A/Yunnan-Hongta/1879/2017      | EPI_ISL_18681118 | EPI2864159 | EPI2864160 | EPI2864158 | EPI2864162 | EPI2864155 | EPI2864161 | EPI2864157 | EPI2864156 |
| A/Yunnan-Mengzi/1732/2017      | EPI_ISL_18681119 | EPI2864167 | EPI2864168 | EPI2864166 | EPI2864170 | EPI2864163 | EPI2864169 | EPI2864165 | EPI2864164 |
| A/Yunnan-Linxiang/11037/2017   | EPI_ISL_18681120 | EPI2864175 | EPI2864176 | EPI2864174 | EPI2864178 | EPI2864171 | EPI2864177 | EPI2864173 | EPI2864172 |
| A/Yunnan-Dali/1386/2017        | EPI_ISL_18681121 | EPI2864183 | EPI2864184 | EPI2864182 | EPI2864186 | EPI2864179 | EPI2864185 | EPI2864181 | EPI2864180 |
| A/Yunnan-Mengzi/11020/2017     | EPI_ISL_18681122 | EPI2864191 | EPI2864192 | EPI2864190 | EPI2864194 | EPI2864187 | EPI2864193 | EPI2864189 | EPI2864188 |
| A/Yunnan-Wenshan/1620/2017     | EPI_ISL_18681123 | EPI2864199 | EPI2864200 | EPI2864198 | EPI2864202 | EPI2864195 | EPI2864201 | EPI2864197 | EPI2864196 |
| A/Yunnan-Hongta/11430/2017     | EPI_ISL_18681124 | EPI2864207 | EPI2864208 | EPI2864206 | EPI2864210 | EPI2864203 | EPI2864209 | EPI2864205 | EPI2864204 |
| A/Yunnan-Hongta/1739/2017      | EPI_ISL_18681125 | EPI2864215 | EPI2864216 | EPI2864214 | EPI2864218 | EPI2864211 | EPI2864217 | EPI2864213 | EPI2864212 |

|                              |                  |            |            |            |            |            |            |            |            |
|------------------------------|------------------|------------|------------|------------|------------|------------|------------|------------|------------|
| A/Yunnan-Mengzi/1699/2017    | EPI_ISL_18681126 | EPI2864223 | EPI2864224 | EPI2864222 | EPI2864226 | EPI2864219 | EPI2864225 | EPI2864221 | EPI2864220 |
| A/Yunnan-Anning/1595/2017    | EPI_ISL_18681127 | EPI2864231 | EPI2864232 | EPI2864230 | EPI2864234 | EPI2864227 | EPI2864233 | EPI2864229 | EPI2864228 |
| A/Yunnan-Hongta/11304/2017   | EPI_ISL_18681128 | EPI2864239 | EPI2864240 | EPI2864238 | EPI2864242 | EPI2864235 | EPI2864241 | EPI2864237 | EPI2864236 |
| A/Yunnan-Dali/1380/2017      | EPI_ISL_18681129 | EPI2864247 | EPI2864248 | EPI2864246 | EPI2864250 | EPI2864243 | EPI2864249 | EPI2864245 | EPI2864244 |
| A/Yunnan-Hongta/11114/2017   | EPI_ISL_18681130 | EPI2864255 | EPI2864256 | EPI2864254 | EPI2864258 | EPI2864251 | EPI2864257 | EPI2864253 | EPI2864252 |
| A/Yunnan-Linxiang/11041/2017 | EPI_ISL_18681131 | EPI2864263 | EPI2864264 | EPI2864262 | EPI2864266 | EPI2864259 | EPI2864265 | EPI2864261 | EPI2864260 |
| A/Yunnan-Linxiang/1611/2017  | EPI_ISL_18681132 | EPI2864271 | EPI2864272 | EPI2864270 | EPI2864274 | EPI2864267 | EPI2864273 | EPI2864269 | EPI2864268 |
| A/Yunnan-Linxiang/11036/2017 | EPI_ISL_18681133 | EPI2864279 | EPI2864280 | EPI2864278 | EPI2864282 | EPI2864275 | EPI2864281 | EPI2864277 | EPI2864276 |
| A/Yunnan-Linxiang/1507/2017  | EPI_ISL_18681134 | EPI2864287 | EPI2864288 | EPI2864286 | EPI2864290 | EPI2864283 | EPI2864289 | EPI2864285 | EPI2864284 |
| A/Yunnan-Linxiang/1616/2017  | EPI_ISL_18681135 | EPI2864295 | EPI2864296 | EPI2864294 | EPI2864298 | EPI2864291 | EPI2864297 | EPI2864293 | EPI2864292 |
| A/Yunnan-Linxiang/11038/2017 | EPI_ISL_18681136 | EPI2864303 | EPI2864304 | EPI2864302 | EPI2864306 | EPI2864299 | EPI2864305 | EPI2864301 | EPI2864300 |
| A/Yunnan-Longyang/11032/2017 | EPI_ISL_18681137 | EPI2864311 | EPI2864312 | EPI2864310 | EPI2864314 | EPI2864307 | EPI2864313 | EPI2864309 | EPI2864308 |
| A/Yunnan-Linxiang/1656/2018  | EPI_ISL_18681138 | EPI2864319 | EPI2864320 | EPI2864318 | EPI2864322 | EPI2864315 | EPI2864321 | EPI2864317 | EPI2864316 |
| A/Yunnan-Linxiang/14/2018    | EPI_ISL_18681139 | EPI2864327 | EPI2864328 | EPI2864326 | EPI2864330 | EPI2864323 | EPI2864329 | EPI2864325 | EPI2864324 |
| A/Yunnan-Linxiang/123/2018   | EPI_ISL_18681140 | EPI2864335 | EPI2864336 | EPI2864334 | EPI2864338 | EPI2864331 | EPI2864337 | EPI2864333 | EPI2864332 |
| A/Yunnan-Linxiang/1660/2018  | EPI_ISL_18681141 | EPI2864343 | EPI2864344 | EPI2864342 | EPI2864346 | EPI2864339 | EPI2864345 | EPI2864341 | EPI2864340 |
| A/Yunnan-Linxiang/114/2018   | EPI_ISL_18681142 | EPI2864351 | EPI2864352 | EPI2864350 | EPI2864354 | EPI2864347 | EPI2864353 | EPI2864349 | EPI2864348 |
| A/Yunnan-Jinghong/176/2018   | EPI_ISL_18681143 | EPI2864359 | EPI2864360 | EPI2864358 | EPI2864362 | EPI2864355 | EPI2864361 | EPI2864357 | EPI2864356 |
| A/Yunnan-Gucheng/1863/2018   | EPI_ISL_18681144 | EPI2864367 | EPI2864368 | EPI2864366 | EPI2864370 | EPI2864363 | EPI2864369 | EPI2864365 | EPI2864364 |
| A/Yunnan-Linxiang/15/2018    | EPI_ISL_18681145 | EPI2864375 | EPI2864376 | EPI2864374 | EPI2864378 | EPI2864371 | EPI2864377 | EPI2864373 | EPI2864372 |
| A/Yunnan-Linxiang/16/2018    | EPI_ISL_18681146 | EPI2864383 | EPI2864384 | EPI2864382 | EPI2864386 | EPI2864379 | EPI2864385 | EPI2864381 | EPI2864380 |
| A/Yunnan-Ruilu/3157/2018     | EPI_ISL_18681147 | EPI2864391 | EPI2864392 | EPI2864390 | EPI2864394 | EPI2864387 | EPI2864393 | EPI2864389 | EPI2864388 |
| A/Yunnan-Linxiang/1594/2018  | EPI_ISL_18681148 | EPI2864399 | EPI2864400 | EPI2864398 | EPI2864402 | EPI2864395 | EPI2864401 | EPI2864397 | EPI2864396 |
| A/Yunnan-Linxiang/1673/2018  | EPI_ISL_18681149 | EPI2864407 | EPI2864408 | EPI2864406 | EPI2864410 | EPI2864403 | EPI2864409 | EPI2864405 | EPI2864404 |
| A/Yunnan-Linxiang/1273/2018  | EPI_ISL_18681150 | EPI2864415 | EPI2864416 | EPI2864414 | EPI2864418 | EPI2864411 | EPI2864417 | EPI2864413 | EPI2864412 |
| A/Yunnan-Linxiang/120/2018   | EPI_ISL_18681151 | EPI2864423 | EPI2864424 | EPI2864422 | EPI2864426 | EPI2864419 | EPI2864425 | EPI2864421 | EPI2864420 |

|                                |                  |            |            |            |            |            |            |            |            |
|--------------------------------|------------------|------------|------------|------------|------------|------------|------------|------------|------------|
| A/Yunnan-Zhaoyang/579/2018     | EPI_ISL_18681152 | EPI2864431 | EPI2864432 | EPI2864430 | EPI2864434 | EPI2864427 | EPI2864433 | EPI2864429 | EPI2864428 |
| A/Yunnan-Qilin/1183/2018       | EPI_ISL_18681153 | EPI2864439 | EPI2864440 | EPI2864438 | EPI2864442 | EPI2864435 | EPI2864441 | EPI2864437 | EPI2864436 |
| A/Yunnan-Mengzi/1920/2018      | EPI_ISL_18681154 | EPI2864447 | EPI2864448 | EPI2864446 | EPI2864450 | EPI2864443 | EPI2864449 | EPI2864445 | EPI2864444 |
| A/Yunnan-Xianggelila/1923/2018 | EPI_ISL_18681155 | EPI2864455 | EPI2864456 | EPI2864454 | EPI2864458 | EPI2864451 | EPI2864457 | EPI2864453 | EPI2864452 |
| A/Yunnan-Mengzi/1162/2019      | EPI_ISL_18681156 | EPI2864463 | EPI2864464 | EPI2864462 | EPI2864466 | EPI2864459 | EPI2864465 | EPI2864461 | EPI2864460 |
| A/Yunnan-Anning/1115/2019      | EPI_ISL_18681157 | EPI2864471 | EPI2864472 | EPI2864470 | EPI2864474 | EPI2864467 | EPI2864473 | EPI2864469 | EPI2864468 |
| A/Yunnan-Zhaoyang/1166/2019    | EPI_ISL_18681158 | EPI2864479 | EPI2864480 | EPI2864478 | EPI2864482 | EPI2864475 | EPI2864481 | EPI2864477 | EPI2864476 |
| A/Yunnan-Xianggelila/186/2019  | EPI_ISL_18681159 | EPI2864487 | EPI2864488 | EPI2864486 | EPI2864490 | EPI2864483 | EPI2864489 | EPI2864485 | EPI2864484 |
| A/Yunnan-Gucheng/1324/2019     | EPI_ISL_18681160 | EPI2864495 | EPI2864496 | EPI2864494 | EPI2864498 | EPI2864491 | EPI2864497 | EPI2864493 | EPI2864492 |
| A/Yunnan-Zhaoyang/1262/2019    | EPI_ISL_18681161 | EPI2864503 | EPI2864504 | EPI2864502 | EPI2864506 | EPI2864499 | EPI2864505 | EPI2864501 | EPI2864500 |
| A/Yunnan-Chuxiong/11474/2019   | EPI_ISL_18681162 | EPI2864511 | EPI2864512 | EPI2864510 | EPI2864514 | EPI2864507 | EPI2864513 | EPI2864509 | EPI2864508 |
| A/Yunnan-Dali/1618/2019        | EPI_ISL_18681163 | EPI2864519 | EPI2864520 | EPI2864518 | EPI2864522 | EPI2864515 | EPI2864521 | EPI2864517 | EPI2864516 |
| A/Yunnan-Guandu/313/2019       | EPI_ISL_18681164 | EPI2864527 | EPI2864528 | EPI2864526 | EPI2864530 | EPI2864523 | EPI2864529 | EPI2864525 | EPI2864524 |
| A/Yunnan-Wuhua/1670/2019       | EPI_ISL_18681165 | EPI2864535 | EPI2864536 | EPI2864534 | EPI2864538 | EPI2864531 | EPI2864537 | EPI2864533 | EPI2864532 |
| A/Yunnan-Lufeng/32/2019        | EPI_ISL_18681166 | EPI2864543 | EPI2864544 | EPI2864542 | EPI2864546 | EPI2864539 | EPI2864545 | EPI2864541 | EPI2864540 |
| A/Yunnan-Lushui/1359/2019      | EPI_ISL_18681167 | EPI2864551 | EPI2864552 | EPI2864550 | EPI2864554 | EPI2864547 | EPI2864553 | EPI2864549 | EPI2864548 |
| A/Yunnan-Wuhua/158/2019        | EPI_ISL_18681358 | EPI2866063 | EPI2866064 | EPI2866062 | EPI2866066 | EPI2866059 | EPI2866065 | EPI2866061 | EPI2866060 |
| A/Yunnan-Linxiang/1557/2019    | EPI_ISL_18681168 | EPI2864559 | EPI2864560 | EPI2864558 | EPI2864562 | EPI2864555 | EPI2864561 | EPI2864557 | EPI2864556 |
| A/Yunnan-Linxiang/1636/2019    | EPI_ISL_18681169 | EPI2864567 | EPI2864568 | EPI2864566 | EPI2864570 | EPI2864563 | EPI2864569 | EPI2864565 | EPI2864564 |
| A/Yunnan-Lushui/1447/2019      | EPI_ISL_18681170 | EPI2864575 | EPI2864576 | EPI2864574 | EPI2864578 | EPI2864571 | EPI2864577 | EPI2864573 | EPI2864572 |
| A/Yunnan-Yiliang/313/2019      | EPI_ISL_18681171 | EPI2864583 | EPI2864584 | EPI2864582 | EPI2864586 | EPI2864579 | EPI2864585 | EPI2864581 | EPI2864580 |
| A/Yunnan-Yongshan/32/2019      | EPI_ISL_18681172 | EPI2864591 | EPI2864592 | EPI2864590 | EPI2864594 | EPI2864587 | EPI2864593 | EPI2864589 | EPI2864588 |
| A/Yunnan-Zhaoyang/11121/2019   | EPI_ISL_18681173 | EPI2864599 | EPI2864600 | EPI2864598 | EPI2864602 | EPI2864595 | EPI2864601 | EPI2864597 | EPI2864596 |
| A/Yunnan-Anning/1199/2019      | EPI_ISL_18681174 | EPI2864607 | EPI2864608 | EPI2864606 | EPI2864610 | EPI2864603 | EPI2864609 | EPI2864605 | EPI2864604 |
| A/Yunnan-Qilin/1453/2019       | EPI_ISL_18681175 | EPI2864615 | EPI2864616 | EPI2864614 | EPI2864618 | EPI2864611 | EPI2864617 | EPI2864613 | EPI2864612 |
| A/Yunnan-Xiangyun/36/2019      | EPI_ISL_18681176 | EPI2864623 | EPI2864624 | EPI2864622 | EPI2864626 | EPI2864619 | EPI2864625 | EPI2864621 | EPI2864620 |

|                              |                  |            |            |            |            |            |            |            |            |
|------------------------------|------------------|------------|------------|------------|------------|------------|------------|------------|------------|
| A/Yunnan-Wenshan/1961/2019   | EPI_ISL_18681177 | EPI2864631 | EPI2864632 | EPI2864630 | EPI2864634 | EPI2864627 | EPI2864633 | EPI2864629 | EPI2864628 |
| A/Yunnan-Xishan/1290/2019    | EPI_ISL_18681178 | EPI2864639 | EPI2864640 | EPI2864638 | EPI2864642 | EPI2864635 | EPI2864641 | EPI2864637 | EPI2864636 |
| A/Yunnan-Gejiu/321/2019      | EPI_ISL_18681179 | EPI2864647 | EPI2864648 | EPI2864646 | EPI2864650 | EPI2864643 | EPI2864649 | EPI2864645 | EPI2864644 |
| A/Yunnan-Lushui/312/2019     | EPI_ISL_18681180 | EPI2864655 | EPI2864656 | EPI2864654 | EPI2864658 | EPI2864651 | EPI2864657 | EPI2864653 | EPI2864652 |
| A/Yunnan-Lushui/1379/2019    | EPI_ISL_18681181 | EPI2864663 | EPI2864664 | EPI2864662 | EPI2864666 | EPI2864659 | EPI2864665 | EPI2864661 | EPI2864660 |
| A/Yunnan-Dali/1600/2019      | EPI_ISL_18681182 | EPI2864671 | EPI2864672 | EPI2864670 | EPI2864674 | EPI2864667 | EPI2864673 | EPI2864669 | EPI2864668 |
| A/Yunnan-Lushui/329/2019     | EPI_ISL_18681183 | EPI2864679 | EPI2864680 | EPI2864678 | EPI2864682 | EPI2864675 | EPI2864681 | EPI2864677 | EPI2864676 |
| A/Yunnan/354/2019            | EPI_ISL_18681184 | EPI2864687 | EPI2864688 | EPI2864686 | EPI2864690 | EPI2864683 | EPI2864689 | EPI2864685 | EPI2864684 |
| A/Yunnan-Jinning/331/2019    | EPI_ISL_18681185 | EPI2864695 | EPI2864696 | EPI2864694 | EPI2864698 | EPI2864691 | EPI2864697 | EPI2864693 | EPI2864692 |
| A/Yunnan-Jinning/338/2019    | EPI_ISL_18681186 | EPI2864703 | EPI2864704 | EPI2864702 | EPI2864706 | EPI2864699 | EPI2864705 | EPI2864701 | EPI2864700 |
| A/Yunnan-Jinning/340/2019    | EPI_ISL_18681187 | EPI2864711 | EPI2864712 | EPI2864710 | EPI2864714 | EPI2864707 | EPI2864713 | EPI2864709 | EPI2864708 |
| A/Yunnan-Jinning/323/2019    | EPI_ISL_18681188 | EPI2864719 | EPI2864720 | EPI2864718 | EPI2864722 | EPI2864715 | EPI2864721 | EPI2864717 | EPI2864716 |
| A/Yunnan-Zhaoyang/11086/2019 | EPI_ISL_18681189 | EPI2864727 | EPI2864728 | EPI2864726 | EPI2864730 | EPI2864723 | EPI2864729 | EPI2864725 | EPI2864724 |
| A/Yunnan-Zhaoyang/11122/2019 | EPI_ISL_18681190 | EPI2864735 | EPI2864736 | EPI2864734 | EPI2864738 | EPI2864731 | EPI2864737 | EPI2864733 | EPI2864732 |
| A/Yunnan-Yiliang/35/2019     | EPI_ISL_18681191 | EPI2864743 | EPI2864744 | EPI2864742 | EPI2864746 | EPI2864739 | EPI2864745 | EPI2864741 | EPI2864740 |
| A/Yunnan-Eshan/329/2019      | EPI_ISL_18681192 | EPI2864751 | EPI2864752 | EPI2864750 | EPI2864754 | EPI2864747 | EPI2864753 | EPI2864749 | EPI2864748 |
| A/Yunnan-Jinghong/11245/2019 | EPI_ISL_18681193 | EPI2864759 | EPI2864760 | EPI2864758 | EPI2864762 | EPI2864755 | EPI2864761 | EPI2864757 | EPI2864756 |
| A/Yunnan-Jinghong/11454/2019 | EPI_ISL_18681194 | EPI2864767 | EPI2864768 | EPI2864766 | EPI2864770 | EPI2864763 | EPI2864769 | EPI2864765 | EPI2864764 |
| A/Yunnan-Jinghong/11351/2019 | EPI_ISL_18681195 | EPI2864775 | EPI2864776 | EPI2864774 | EPI2864778 | EPI2864771 | EPI2864777 | EPI2864773 | EPI2864772 |
| A/Yunnan-Jinghong/11342/2019 | EPI_ISL_18681196 | EPI2864783 | EPI2864784 | EPI2864782 | EPI2864786 | EPI2864779 | EPI2864785 | EPI2864781 | EPI2864780 |
| A/Yunnan-Mangshi/331/2019    | EPI_ISL_18681197 | EPI2864791 | EPI2864792 | EPI2864790 | EPI2864794 | EPI2864787 | EPI2864793 | EPI2864789 | EPI2864788 |
| A/Yunnan-Linxiang/1756/2019  | EPI_ISL_18681198 | EPI2864799 | EPI2864800 | EPI2864798 | EPI2864802 | EPI2864795 | EPI2864801 | EPI2864797 | EPI2864796 |
| A/Yunnan-Mangshi/1537/2019   | EPI_ISL_18681199 | EPI2864807 | EPI2864808 | EPI2864806 | EPI2864810 | EPI2864803 | EPI2864809 | EPI2864805 | EPI2864804 |
| A/Yunnan-Mangshi/1597/2019   | EPI_ISL_18681200 | EPI2864815 | EPI2864816 | EPI2864814 | EPI2864818 | EPI2864811 | EPI2864817 | EPI2864813 | EPI2864812 |
| A/Yunnan-Jinghong/11371/2019 | EPI_ISL_18681201 | EPI2864823 | EPI2864824 | EPI2864822 | EPI2864826 | EPI2864819 | EPI2864825 | EPI2864821 | EPI2864820 |
| A/Yunnan-Hongta/1689/2019    | EPI_ISL_18681202 | EPI2864831 | EPI2864832 | EPI2864830 | EPI2864834 | EPI2864827 | EPI2864833 | EPI2864829 | EPI2864828 |

|                              |                  |            |            |            |            |            |            |            |            |
|------------------------------|------------------|------------|------------|------------|------------|------------|------------|------------|------------|
| A/Yunnan-Guandu/1832/2019    | EPI_ISL_18681203 | EPI2864839 | EPI2864840 | EPI2864838 | EPI2864842 | EPI2864835 | EPI2864841 | EPI2864837 | EPI2864836 |
| A/Yunnan-Dali/1614/2019      | EPI_ISL_18681204 | EPI2864847 | EPI2864848 | EPI2864846 | EPI2864850 | EPI2864843 | EPI2864849 | EPI2864845 | EPI2864844 |
| A/Yunnan-Guandu/32/2019      | EPI_ISL_18681205 | EPI2864855 | EPI2864856 | EPI2864854 | EPI2864858 | EPI2864851 | EPI2864857 | EPI2864853 | EPI2864852 |
| A/Yunnan-Guandu/1898/2019    | EPI_ISL_18681206 | EPI2864863 | EPI2864864 | EPI2864862 | EPI2864866 | EPI2864859 | EPI2864865 | EPI2864861 | EPI2864860 |
| A/Yunnan-Mile/312/2019       | EPI_ISL_18681207 | EPI2864871 | EPI2864872 | EPI2864870 | EPI2864874 | EPI2864867 | EPI2864873 | EPI2864869 | EPI2864868 |
| A/Yunnan-Gejiu/365/2019      | EPI_ISL_18681208 | EPI2864879 | EPI2864880 | EPI2864878 | EPI2864882 | EPI2864875 | EPI2864881 | EPI2864877 | EPI2864876 |
| A/Yunnan/11056/2019          | EPI_ISL_18681209 | EPI2864887 | EPI2864888 | EPI2864886 | EPI2864890 | EPI2864883 | EPI2864889 | EPI2864885 | EPI2864884 |
| A/Yunnan/11102/2019          | EPI_ISL_18681210 | EPI2864895 | EPI2864896 | EPI2864894 | EPI2864898 | EPI2864891 | EPI2864897 | EPI2864893 | EPI2864892 |
| A/Yunnan/11108/2019          | EPI_ISL_18681211 | EPI2864903 | EPI2864904 | EPI2864902 | EPI2864906 | EPI2864899 | EPI2864905 | EPI2864901 | EPI2864900 |
| A/Yunnan-Lushui/11033/2019   | EPI_ISL_18681212 | EPI2864911 | EPI2864912 | EPI2864910 | EPI2864914 | EPI2864907 | EPI2864913 | EPI2864909 | EPI2864908 |
| A/Yunnan-Simao/11541/2019    | EPI_ISL_18681213 | EPI2864919 | EPI2864920 | EPI2864918 | EPI2864922 | EPI2864915 | EPI2864921 | EPI2864917 | EPI2864916 |
| A/Yunnan-Lushui/1999/2019    | EPI_ISL_18681214 | EPI2864927 | EPI2864928 | EPI2864926 | EPI2864930 | EPI2864923 | EPI2864929 | EPI2864925 | EPI2864924 |
| A/Yunnan-Lushui/11012/2019   | EPI_ISL_18681215 | EPI2864935 | EPI2864936 | EPI2864934 | EPI2864938 | EPI2864931 | EPI2864937 | EPI2864933 | EPI2864932 |
| A/Yunnan-Lushui/1989/2019    | EPI_ISL_18681216 | EPI2864943 | EPI2864944 | EPI2864942 | EPI2864946 | EPI2864939 | EPI2864945 | EPI2864941 | EPI2864940 |
| A/Yunnan-Lushui/11043/2019   | EPI_ISL_18681217 | EPI2864951 | EPI2864952 | EPI2864950 | EPI2864954 | EPI2864947 | EPI2864953 | EPI2864949 | EPI2864948 |
| A/Yunnan-Jinghong/11305/2019 | EPI_ISL_18681218 | EPI2864959 | EPI2864960 | EPI2864958 | EPI2864962 | EPI2864955 | EPI2864961 | EPI2864957 | EPI2864956 |
| A/Yunnan-Zhaoyang/1387/2019  | EPI_ISL_18681219 | EPI2864967 | EPI2864968 | EPI2864966 | EPI2864970 | EPI2864963 | EPI2864969 | EPI2864965 | EPI2864964 |
| A/Yunnan-Luoping/314/2019    | EPI_ISL_18681220 | EPI2864975 | EPI2864976 | EPI2864974 | EPI2864978 | EPI2864971 | EPI2864977 | EPI2864973 | EPI2864972 |
| A/Yunnan-Fumin/314/2019      | EPI_ISL_18681221 | EPI2864983 | EPI2864984 | EPI2864982 | EPI2864986 | EPI2864979 | EPI2864985 | EPI2864981 | EPI2864980 |
| A/Yunnan-Mengzi/1910/2019    | EPI_ISL_18681222 | EPI2864991 | EPI2864992 | EPI2864990 | EPI2864994 | EPI2864987 | EPI2864993 | EPI2864989 | EPI2864988 |
| A/Yunnan-Simao/12116/2019    | EPI_ISL_18681223 | EPI2864999 | EPI2865000 | EPI2864998 | EPI2865002 | EPI2864995 | EPI2865001 | EPI2864997 | EPI2864996 |
| A/Yunnan-Simao/12179/2019    | EPI_ISL_18681224 | EPI2865007 | EPI2865008 | EPI2865006 | EPI2865010 | EPI2865003 | EPI2865009 | EPI2865005 | EPI2865004 |
| A/Yunnan-Yingjiang/363/2019  | EPI_ISL_18681225 | EPI2865015 | EPI2865016 | EPI2865014 | EPI2865018 | EPI2865011 | EPI2865017 | EPI2865013 | EPI2865012 |
| A/Yunnan-Shiping/34/2019     | EPI_ISL_18681226 | EPI2865023 | EPI2865024 | EPI2865022 | EPI2865026 | EPI2865019 | EPI2865025 | EPI2865021 | EPI2865020 |
| A/Yunnan-Fumin/312/2019      | EPI_ISL_18681227 | EPI2865031 | EPI2865032 | EPI2865030 | EPI2865034 | EPI2865027 | EPI2865033 | EPI2865029 | EPI2865028 |
| A/Yunnan-Gejiu/325/2019      | EPI_ISL_18681228 | EPI2865039 | EPI2865040 | EPI2865038 | EPI2865042 | EPI2865035 | EPI2865041 | EPI2865037 | EPI2865036 |

|                             |                  |            |            |            |            |            |            |            |            |
|-----------------------------|------------------|------------|------------|------------|------------|------------|------------|------------|------------|
| A/Yunnan-Mengzi/1856/2019   | EPI_ISL_18681229 | EPI2865047 | EPI2865048 | EPI2865046 | EPI2865050 | EPI2865043 | EPI2865049 | EPI2865045 | EPI2865044 |
| A/Yunnan-Mengzi/1882/2019   | EPI_ISL_18681230 | EPI2865055 | EPI2865056 | EPI2865054 | EPI2865058 | EPI2865051 | EPI2865057 | EPI2865053 | EPI2865052 |
| A/Yunnan-Wenshan/11039/2019 | EPI_ISL_18681231 | EPI2865063 | EPI2865064 | EPI2865062 | EPI2865066 | EPI2865059 | EPI2865065 | EPI2865061 | EPI2865060 |
| A/Yunnan-Mengzi/1764/2019   | EPI_ISL_18681232 | EPI2865071 | EPI2865072 | EPI2865070 | EPI2865074 | EPI2865067 | EPI2865073 | EPI2865069 | EPI2865068 |
| A/Yunnan-Mengzi/1866/2019   | EPI_ISL_18681233 | EPI2865079 | EPI2865080 | EPI2865078 | EPI2865082 | EPI2865075 | EPI2865081 | EPI2865077 | EPI2865076 |
| A/Yunnan-Gucheng/138/2020   | EPI_ISL_18681234 | EPI2865087 | EPI2865088 | EPI2865086 | EPI2865090 | EPI2865083 | EPI2865089 | EPI2865085 | EPI2865084 |
| A/Yunnan-Longyang/180/2020  | EPI_ISL_18681235 | EPI2865095 | EPI2865096 | EPI2865094 | EPI2865098 | EPI2865091 | EPI2865097 | EPI2865093 | EPI2865092 |
| A/Yunnan-Linxiang/1657/2020 | EPI_ISL_18681236 | EPI2865103 | EPI2865104 | EPI2865102 | EPI2865106 | EPI2865099 | EPI2865105 | EPI2865101 | EPI2865100 |
| A/Yunnan-Linxiang/1668/2020 | EPI_ISL_18681237 | EPI2865111 | EPI2865112 | EPI2865110 | EPI2865114 | EPI2865107 | EPI2865113 | EPI2865109 | EPI2865108 |
| A/Yunnan-Linxiang/1480/2020 | EPI_ISL_18681238 | EPI2865119 | EPI2865120 | EPI2865118 | EPI2865122 | EPI2865115 | EPI2865121 | EPI2865117 | EPI2865116 |
| A/Yunnan-Linxiang/1677/2020 | EPI_ISL_18681239 | EPI2865127 | EPI2865128 | EPI2865126 | EPI2865130 | EPI2865123 | EPI2865129 | EPI2865125 | EPI2865124 |
| A/Yunnan-Chuxiong/157/2020  | EPI_ISL_18681240 | EPI2865135 | EPI2865136 | EPI2865134 | EPI2865138 | EPI2865131 | EPI2865137 | EPI2865133 | EPI2865132 |
| A/Yunnan-Wenshan/1599/2020  | EPI_ISL_18681241 | EPI2865143 | EPI2865144 | EPI2865142 | EPI2865146 | EPI2865139 | EPI2865145 | EPI2865141 | EPI2865140 |
| A/Yunnan-Jinghong/122/2020  | EPI_ISL_18681242 | EPI2865151 | EPI2865152 | EPI2865150 | EPI2865154 | EPI2865147 | EPI2865153 | EPI2865149 | EPI2865148 |
| A/Yunnan-Jinghong/150/2020  | EPI_ISL_18681243 | EPI2865159 | EPI2865160 | EPI2865158 | EPI2865162 | EPI2865155 | EPI2865161 | EPI2865157 | EPI2865156 |
| A/Yunnan-Linxiang/1650/2020 | EPI_ISL_18681244 | EPI2865167 | EPI2865168 | EPI2865166 | EPI2865170 | EPI2865163 | EPI2865169 | EPI2865165 | EPI2865164 |
| A/Yunnan-Linxiang/1670/2020 | EPI_ISL_18681245 | EPI2865175 | EPI2865176 | EPI2865174 | EPI2865178 | EPI2865171 | EPI2865177 | EPI2865173 | EPI2865172 |
| A/Yunnan-Wenshan/1487/2020  | EPI_ISL_18681246 | EPI2865183 | EPI2865184 | EPI2865182 | EPI2865186 | EPI2865179 | EPI2865185 | EPI2865181 | EPI2865180 |
| A/Yunnan-Guandu/18/2020     | EPI_ISL_18681247 | EPI2865191 | EPI2865192 | EPI2865190 | EPI2865194 | EPI2865187 | EPI2865193 | EPI2865189 | EPI2865188 |
| A/Yunnan-Wenshan/1485/2020  | EPI_ISL_18681248 | EPI2865199 | EPI2865200 | EPI2865198 | EPI2865202 | EPI2865195 | EPI2865201 | EPI2865197 | EPI2865196 |
| A/Yunnan-Gucheng/1268/2020  | EPI_ISL_18681249 | EPI2865207 | EPI2865208 | EPI2865206 | EPI2865210 | EPI2865203 | EPI2865209 | EPI2865205 | EPI2865204 |
| A/Yunnan-Wenshan/1424/2020  | EPI_ISL_18681250 | EPI2865215 | EPI2865216 | EPI2865214 | EPI2865218 | EPI2865211 | EPI2865217 | EPI2865213 | EPI2865212 |
| A/Yunnan-Jinghong/11/2020   | EPI_ISL_18681251 | EPI2865223 | EPI2865224 | EPI2865222 | EPI2865226 | EPI2865219 | EPI2865225 | EPI2865221 | EPI2865220 |
| A/Yunnan-Wenshan/1435/2020  | EPI_ISL_18681252 | EPI2865231 | EPI2865232 | EPI2865230 | EPI2865234 | EPI2865227 | EPI2865233 | EPI2865229 | EPI2865228 |
| A/Yunnan-Wenshan/1476/2020  | EPI_ISL_18681253 | EPI2865239 | EPI2865240 | EPI2865238 | EPI2865242 | EPI2865235 | EPI2865241 | EPI2865237 | EPI2865236 |
| A/Yunnan-Wenshan/1481/2020  | EPI_ISL_18681254 | EPI2865247 | EPI2865248 | EPI2865246 | EPI2865250 | EPI2865243 | EPI2865249 | EPI2865245 | EPI2865244 |

|                             |                  |            |            |            |            |            |            |            |            |
|-----------------------------|------------------|------------|------------|------------|------------|------------|------------|------------|------------|
| A/Yunnan-Wenshan/1606/2020  | EPI_ISL_18681255 | EPI2865255 | EPI2865256 | EPI2865254 | EPI2865258 | EPI2865251 | EPI2865257 | EPI2865253 | EPI2865252 |
| A/Yunnan-Wenshan/1594/2020  | EPI_ISL_18681256 | EPI2865263 | EPI2865264 | EPI2865262 | EPI2865266 | EPI2865259 | EPI2865265 | EPI2865261 | EPI2865260 |
| A/Yunnan-Wenshan/1593/2020  | EPI_ISL_18681257 | EPI2865271 | EPI2865272 | EPI2865270 | EPI2865274 | EPI2865267 | EPI2865273 | EPI2865269 | EPI2865268 |
| A/Yunnan-Wenshan/1592/2020  | EPI_ISL_18681258 | EPI2865279 | EPI2865280 | EPI2865278 | EPI2865282 | EPI2865275 | EPI2865281 | EPI2865277 | EPI2865276 |
| A/Yunnan-Wenshan/1483/2020  | EPI_ISL_18681259 | EPI2865287 | EPI2865288 | EPI2865286 | EPI2865290 | EPI2865283 | EPI2865289 | EPI2865285 | EPI2865284 |
| A/Yunnan-Wenshan/1489/2020  | EPI_ISL_18681260 | EPI2865295 | EPI2865296 | EPI2865294 | EPI2865298 | EPI2865291 | EPI2865297 | EPI2865293 | EPI2865292 |
| A/Yunnan-Jinghong/168/2020  | EPI_ISL_18681261 | EPI2865303 | EPI2865304 | EPI2865302 | EPI2865306 | EPI2865299 | EPI2865305 | EPI2865301 | EPI2865300 |
| A/Yunnan-Qilin/11/2020      | EPI_ISL_18681262 | EPI2865311 | EPI2865312 | EPI2865310 | EPI2865314 | EPI2865307 | EPI2865313 | EPI2865309 | EPI2865308 |
| A/Yunnan-Longyang/164/2020  | EPI_ISL_18681263 | EPI2865319 | EPI2865320 | EPI2865318 | EPI2865322 | EPI2865315 | EPI2865321 | EPI2865317 | EPI2865316 |
| A/Yunnan-Linxiang/130/2021  | EPI_ISL_18681264 | EPI2865327 | EPI2865328 | EPI2865326 | EPI2865330 | EPI2865323 | EPI2865329 | EPI2865325 | EPI2865324 |
| A/Yunnan-Linxiang/132/2021  | EPI_ISL_18681265 | EPI2865335 | EPI2865336 | EPI2865334 | EPI2865338 | EPI2865331 | EPI2865337 | EPI2865333 | EPI2865332 |
| A/Yunnan-Wenshan/1209/2021  | EPI_ISL_18681266 | EPI2865343 | EPI2865344 | EPI2865342 | EPI2865346 | EPI2865339 | EPI2865345 | EPI2865341 | EPI2865340 |
| A/Yunnan-Wenshan/1199/2021  | EPI_ISL_18681267 | EPI2865351 | EPI2865352 | EPI2865350 | EPI2865354 | EPI2865347 | EPI2865353 | EPI2865349 | EPI2865348 |
| A/Yunnan-Wenshan/1183/2021  | EPI_ISL_18681268 | EPI2865359 | EPI2865360 | EPI2865358 | EPI2865362 | EPI2865355 | EPI2865361 | EPI2865357 | EPI2865356 |
| A/Yunnan-Wenshan/1193/2021  | EPI_ISL_18681269 | EPI2865367 | EPI2865368 | EPI2865366 | EPI2865370 | EPI2865363 | EPI2865369 | EPI2865365 | EPI2865364 |
| A/Yunnan-Wenshan/1213/2021  | EPI_ISL_18681270 | EPI2865375 | EPI2865376 | EPI2865374 | EPI2865378 | EPI2865371 | EPI2865377 | EPI2865373 | EPI2865372 |
| A/Yunnan-Wenshan/1218/2021  | EPI_ISL_18681271 | EPI2865383 | EPI2865384 | EPI2865382 | EPI2865386 | EPI2865379 | EPI2865385 | EPI2865381 | EPI2865380 |
| A/Yunnan-Chuxiong/1459/2022 | EPI_ISL_18681272 | EPI2865391 | EPI2865392 | EPI2865390 | EPI2865394 | EPI2865387 | EPI2865393 | EPI2865389 | EPI2865388 |
| A/Yunnan-Chuxiong/1471/2022 | EPI_ISL_18681273 | EPI2865399 | EPI2865400 | EPI2865398 | EPI2865402 | EPI2865395 | EPI2865401 | EPI2865397 | EPI2865396 |
| A/Yunnan-Chuxiong/317/2022  | EPI_ISL_18681274 | EPI2865407 | EPI2865408 | EPI2865406 | EPI2865410 | EPI2865403 | EPI2865409 | EPI2865405 | EPI2865404 |
| A/Yunnan-Chuxiong/1499/2022 | EPI_ISL_18681275 | EPI2865415 | EPI2865416 | EPI2865414 | EPI2865418 | EPI2865411 | EPI2865417 | EPI2865413 | EPI2865412 |
| A/Yunnan-Chuxiong/351/2022  | EPI_ISL_18681276 | EPI2865423 | EPI2865424 | EPI2865422 | EPI2865426 | EPI2865419 | EPI2865425 | EPI2865421 | EPI2865420 |
| A/Yunnan-Chuxiong/349/2022  | EPI_ISL_18681277 | EPI2865431 | EPI2865432 | EPI2865430 | EPI2865434 | EPI2865427 | EPI2865433 | EPI2865429 | EPI2865428 |
| A/Yunnan-Chuxiong/348/2022  | EPI_ISL_18681278 | EPI2865439 | EPI2865440 | EPI2865438 | EPI2865442 | EPI2865435 | EPI2865441 | EPI2865437 | EPI2865436 |
| A/Yunnan-Wenshan/1576/2022  | EPI_ISL_18681279 | EPI2865447 | EPI2865448 | EPI2865446 | EPI2865450 | EPI2865443 | EPI2865449 | EPI2865445 | EPI2865444 |
| A/Yunnan-Wenshan/1591/2022  | EPI_ISL_18681280 | EPI2865455 | EPI2865456 | EPI2865454 | EPI2865458 | EPI2865451 | EPI2865457 | EPI2865453 | EPI2865452 |

|                             |                  |            |            |            |            |            |            |            |            |
|-----------------------------|------------------|------------|------------|------------|------------|------------|------------|------------|------------|
| A/Yunnan-Anning/11018/2022  | EPI_ISL_18681281 | EPI2865463 | EPI2865464 | EPI2865462 | EPI2865466 | EPI2865459 | EPI2865465 | EPI2865461 | EPI2865460 |
| A/Yunnan-Anning/11119/2022  | EPI_ISL_18681282 | EPI2865471 | EPI2865472 | EPI2865470 | EPI2865474 | EPI2865467 | EPI2865473 | EPI2865469 | EPI2865468 |
| A/Yunnan-Anning/11150/2022  | EPI_ISL_18681283 | EPI2865479 | EPI2865480 | EPI2865478 | EPI2865482 | EPI2865475 | EPI2865481 | EPI2865477 | EPI2865476 |
| A/Yunnan-Anning/11181/2022  | EPI_ISL_18681284 | EPI2865487 | EPI2865488 | EPI2865486 | EPI2865490 | EPI2865483 | EPI2865489 | EPI2865485 | EPI2865484 |
| A/Yunnan-Anning/11216/2022  | EPI_ISL_18681285 | EPI2865495 | EPI2865496 | EPI2865494 | EPI2865498 | EPI2865491 | EPI2865497 | EPI2865493 | EPI2865492 |
| A/Yunnan-Anning/11171/2022  | EPI_ISL_18681286 | EPI2865503 | EPI2865504 | EPI2865502 | EPI2865506 | EPI2865499 | EPI2865505 | EPI2865501 | EPI2865500 |
| A/Yunnan-Mangshi/11029/2022 | EPI_ISL_18681287 | EPI2865511 | EPI2865512 | EPI2865510 | EPI2865514 | EPI2865507 | EPI2865513 | EPI2865509 | EPI2865508 |
| A/Yunnan-Mengzi/1386/2022   | EPI_ISL_18681288 | EPI2865519 | EPI2865520 | EPI2865518 | EPI2865522 | EPI2865515 | EPI2865521 | EPI2865517 | EPI2865516 |
| A/Yunnan-Anning/11177/2022  | EPI_ISL_18681289 | EPI2865527 | EPI2865528 | EPI2865526 | EPI2865530 | EPI2865523 | EPI2865529 | EPI2865525 | EPI2865524 |
| A/Yunnan-Anning/1778/2022   | EPI_ISL_18681290 | EPI2865535 | EPI2865536 | EPI2865534 | EPI2865538 | EPI2865531 | EPI2865537 | EPI2865533 | EPI2865532 |
| A/Yunnan-Anning/1813/2022   | EPI_ISL_18681291 | EPI2865543 | EPI2865544 | EPI2865542 | EPI2865546 | EPI2865539 | EPI2865545 | EPI2865541 | EPI2865540 |
| A/Yunnan-Mangshi/1464/2022  | EPI_ISL_18681292 | EPI2865551 | EPI2865552 | EPI2865550 | EPI2865554 | EPI2865547 | EPI2865553 | EPI2865549 | EPI2865548 |
| A/Yunnan-Mangshi/1610/2022  | EPI_ISL_18681293 | EPI2865559 | EPI2865560 | EPI2865558 | EPI2865562 | EPI2865555 | EPI2865561 | EPI2865557 | EPI2865556 |
| A/Yunnan-Mangshi/1667/2022  | EPI_ISL_18681294 | EPI2865567 | EPI2865568 | EPI2865566 | EPI2865570 | EPI2865563 | EPI2865569 | EPI2865565 | EPI2865564 |
| A/Yunnan-Mangshi/1888/2022  | EPI_ISL_18681295 | EPI2865575 | EPI2865576 | EPI2865574 | EPI2865578 | EPI2865571 | EPI2865577 | EPI2865573 | EPI2865572 |
| A/Yunnan-Mangshi/11006/2022 | EPI_ISL_18681296 | EPI2865583 | EPI2865584 | EPI2865582 | EPI2865586 | EPI2865579 | EPI2865585 | EPI2865581 | EPI2865580 |
| A/Yunnan-Mangshi/349/2022   | EPI_ISL_18681297 | EPI2865591 | EPI2865592 | EPI2865590 | EPI2865594 | EPI2865587 | EPI2865593 | EPI2865589 | EPI2865588 |
| A/Yunnan-Mangshi/1907/2022  | EPI_ISL_18681298 | EPI2865599 | EPI2865600 | EPI2865598 | EPI2865602 | EPI2865595 | EPI2865601 | EPI2865597 | EPI2865596 |
| A/Yunnan-Mangshi/1852/2022  | EPI_ISL_18681299 | EPI2865607 | EPI2865608 | EPI2865606 | EPI2865610 | EPI2865603 | EPI2865609 | EPI2865605 | EPI2865604 |
| A/Yunnan-Mangshi/1925/2022  | EPI_ISL_18681300 | EPI2865615 | EPI2865616 | EPI2865614 | EPI2865618 | EPI2865611 | EPI2865617 | EPI2865613 | EPI2865612 |
| A/Yunnan-Mangshi/1938/2022  | EPI_ISL_18681301 | EPI2865623 | EPI2865624 | EPI2865622 | EPI2865626 | EPI2865619 | EPI2865625 | EPI2865621 | EPI2865620 |
| A/Yunnan-Mangshi/1990/2022  | EPI_ISL_18681302 | EPI2865631 | EPI2865632 | EPI2865630 | EPI2865634 | EPI2865627 | EPI2865633 | EPI2865629 | EPI2865628 |
| A/Yunnan-Linxiang/1183/2022 | EPI_ISL_18681303 | EPI2865639 | EPI2865640 | EPI2865638 | EPI2865642 | EPI2865635 | EPI2865641 | EPI2865637 | EPI2865636 |
| A/Yunnan-Simao/1948/2022    | EPI_ISL_18681304 | EPI2865647 | EPI2865648 | EPI2865646 | EPI2865650 | EPI2865643 | EPI2865649 | EPI2865645 | EPI2865644 |
| A/Yunnan-Funing/310/2022    | EPI_ISL_18681305 | EPI2865655 | EPI2865656 | EPI2865654 | EPI2865658 | EPI2865651 | EPI2865657 | EPI2865653 | EPI2865652 |
| A/Yunnan-Hongta/11014/2022  | EPI_ISL_18681306 | EPI2865663 | EPI2865664 | EPI2865662 | EPI2865666 | EPI2865659 | EPI2865665 | EPI2865661 | EPI2865660 |



|                             |                  |            |            |            |            |            |            |            |            |
|-----------------------------|------------------|------------|------------|------------|------------|------------|------------|------------|------------|
| A/Yunnan-Zhenxiong/533/2022 | EPI_ISL_18681307 | EPI2865671 | EPI2865672 | EPI2865670 | EPI2865674 | EPI2865667 | EPI2865673 | EPI2865669 | EPI2865668 |
| A/Yunnan-Zhaoyang/1405/2022 | EPI_ISL_18681308 | EPI2865679 | EPI2865680 | EPI2865678 | EPI2865682 | EPI2865675 | EPI2865681 | EPI2865677 | EPI2865676 |
| A/Yunnan-Zhaoyang/1402/2022 | EPI_ISL_18681309 | EPI2865687 | EPI2865688 | EPI2865686 | EPI2865690 | EPI2865683 | EPI2865689 | EPI2865685 | EPI2865684 |
| A/Yunnan-Hongta/11154/2022  | EPI_ISL_18681310 | EPI2865695 | EPI2865696 | EPI2865694 | EPI2865698 | EPI2865691 | EPI2865697 | EPI2865693 | EPI2865692 |
| A/Yunnan-Hongta/11161/2022  | EPI_ISL_18681311 | EPI2865703 | EPI2865704 | EPI2865702 | EPI2865706 | EPI2865699 | EPI2865705 | EPI2865701 | EPI2865700 |
| A/Yunnan-Qilin/1421/2022    | EPI_ISL_18681312 | EPI2865711 | EPI2865712 | EPI2865710 | EPI2865714 | EPI2865707 | EPI2865713 | EPI2865709 | EPI2865708 |
| A/Yunnan-Qilin/1487/2022    | EPI_ISL_18681313 | EPI2865719 | EPI2865720 | EPI2865718 | EPI2865722 | EPI2865715 | EPI2865721 | EPI2865717 | EPI2865716 |
| A/Yunnan-Qilin/1467/2022    | EPI_ISL_18681314 | EPI2865727 | EPI2865728 | EPI2865726 | EPI2865730 | EPI2865723 | EPI2865729 | EPI2865725 | EPI2865724 |
| A/Yunnan-Qilin/1475/2022    | EPI_ISL_18681315 | EPI2865735 | EPI2865736 | EPI2865734 | EPI2865738 | EPI2865731 | EPI2865737 | EPI2865733 | EPI2865732 |
| A/Yunnan-Zhenxiong/530/2022 | EPI_ISL_18681316 | EPI2865743 | EPI2865744 | EPI2865742 | EPI2865746 | EPI2865739 | EPI2865745 | EPI2865741 | EPI2865740 |
| A/Yunnan-Zhaoyang/1414/2022 | EPI_ISL_18681317 | EPI2865751 | EPI2865752 | EPI2865750 | EPI2865754 | EPI2865747 | EPI2865753 | EPI2865749 | EPI2865748 |
| A/Yunnan-Zhenxiong/531/2022 | EPI_ISL_18681318 | EPI2865759 | EPI2865760 | EPI2865758 | EPI2865762 | EPI2865755 | EPI2865761 | EPI2865757 | EPI2865756 |
| A/Yunnan-Qilin/1483/2022    | EPI_ISL_18681319 | EPI2865767 | EPI2865768 | EPI2865766 | EPI2865770 | EPI2865763 | EPI2865769 | EPI2865765 | EPI2865764 |
| A/Yunnan-Mengzi/1497/2022   | EPI_ISL_18681320 | EPI2865775 | EPI2865776 | EPI2865774 | EPI2865778 | EPI2865771 | EPI2865777 | EPI2865773 | EPI2865772 |
| A/Yunnan-Malipo/51/2022     | EPI_ISL_18681321 | EPI2865783 | EPI2865784 | EPI2865782 | EPI2865786 | EPI2865779 | EPI2865785 | EPI2865781 | EPI2865780 |
| A/Yunnan-Funing/314/2022    | EPI_ISL_18681322 | EPI2865791 | EPI2865792 | EPI2865790 | EPI2865794 | EPI2865787 | EPI2865793 | EPI2865789 | EPI2865788 |
| A/Yunnan-Hongta/11144/2022  | EPI_ISL_18681323 | EPI2865799 | EPI2865800 | EPI2865798 | EPI2865802 | EPI2865795 | EPI2865801 | EPI2865797 | EPI2865796 |
| A/Yunnan-Yingjiang/324/2022 | EPI_ISL_18681324 | EPI2865807 | EPI2865808 | EPI2865806 | EPI2865810 | EPI2865803 | EPI2865809 | EPI2865805 | EPI2865804 |
| A/Yunnan-Linxiang/1188/2022 | EPI_ISL_18681325 | EPI2865815 | EPI2865816 | EPI2865814 | EPI2865818 | EPI2865811 | EPI2865817 | EPI2865813 | EPI2865812 |
| A/Yunnan-Mangshi/1732/2022  | EPI_ISL_18681326 | EPI2865823 | EPI2865824 | EPI2865822 | EPI2865826 | EPI2865819 | EPI2865825 | EPI2865821 | EPI2865820 |
| A/Yunnan-Yingjiang/359/2022 | EPI_ISL_18681327 | EPI2865831 | EPI2865832 | EPI2865830 | EPI2865834 | EPI2865827 | EPI2865833 | EPI2865829 | EPI2865828 |
| A/Yunnan-Gejiu/345/2022     | EPI_ISL_18681328 | EPI2865839 | EPI2865840 | EPI2865838 | EPI2865842 | EPI2865835 | EPI2865841 | EPI2865837 | EPI2865836 |
| A/Yunnan-Gejiu/343/2022     | EPI_ISL_18681329 | EPI2865847 | EPI2865848 | EPI2865846 | EPI2865850 | EPI2865843 | EPI2865849 | EPI2865845 | EPI2865844 |
| A/Yunnan-Gejiu/335/2022     | EPI_ISL_18681330 | EPI2865855 | EPI2865856 | EPI2865854 | EPI2865858 | EPI2865851 | EPI2865857 | EPI2865853 | EPI2865852 |
| A/Yunnan-Hongta/11028/2022  | EPI_ISL_18681331 | EPI2865863 | EPI2865864 | EPI2865862 | EPI2865866 | EPI2865859 | EPI2865865 | EPI2865861 | EPI2865860 |
| A/Yunnan-Gejiu/329/2022     | EPI_ISL_18681332 | EPI2865871 | EPI2865872 | EPI2865870 | EPI2865874 | EPI2865867 | EPI2865873 | EPI2865869 | EPI2865868 |

|                                 |                  |            |            |            |            |            |            |            |            |
|---------------------------------|------------------|------------|------------|------------|------------|------------|------------|------------|------------|
| A/Yunnan-Linxiang/1212/2022     | EPI_ISL_18681333 | EPI2865879 | EPI2865880 | EPI2865878 | EPI2865882 | EPI2865875 | EPI2865881 | EPI2865877 | EPI2865876 |
| A/Yunnan-Mengzi/1377/2022       | EPI_ISL_18681334 | EPI2865887 | EPI2865888 | EPI2865886 | EPI2865890 | EPI2865883 | EPI2865889 | EPI2865885 | EPI2865884 |
| A/Yunnan-Linxiang/1206/2022     | EPI_ISL_18681335 | EPI2865895 | EPI2865896 | EPI2865894 | EPI2865898 | EPI2865891 | EPI2865897 | EPI2865893 | EPI2865892 |
| A/Yunnan-Linxiang/1216/2022     | EPI_ISL_18681336 | EPI2865903 | EPI2865904 | EPI2865902 | EPI2865906 | EPI2865899 | EPI2865905 | EPI2865901 | EPI2865900 |
| A/Yunnan-Jinping/399/2022       | EPI_ISL_18681337 | EPI2865911 | EPI2865912 | EPI2865910 | EPI2865914 | EPI2865907 | EPI2865913 | EPI2865909 | EPI2865908 |
| A/Yunnan-Malipo/37/2022         | EPI_ISL_18681338 | EPI2865919 | EPI2865920 | EPI2865918 | EPI2865922 | EPI2865915 | EPI2865921 | EPI2865917 | EPI2865916 |
| A/Yunnan-Xishan/11119/2022      | EPI_ISL_18681339 | EPI2865927 | EPI2865928 | EPI2865926 | EPI2865930 | EPI2865923 | EPI2865929 | EPI2865925 | EPI2865924 |
| A/Yunnan-Qilin/1582/2022        | EPI_ISL_18681340 | EPI2865935 | EPI2865936 | EPI2865934 | EPI2865938 | EPI2865931 | EPI2865937 | EPI2865933 | EPI2865932 |
| A/Yunnan-Qilin/1583/2022        | EPI_ISL_18681341 | EPI2865943 | EPI2865944 | EPI2865942 | EPI2865946 | EPI2865939 | EPI2865945 | EPI2865941 | EPI2865940 |
| A/Yunnan-Mengzi/1387/2022       | EPI_ISL_18681342 | EPI2865951 | EPI2865952 | EPI2865950 | EPI2865954 | EPI2865947 | EPI2865953 | EPI2865949 | EPI2865948 |
| A/Yunnan-Qilin/1959/2022        | EPI_ISL_18681343 | EPI2865959 | EPI2865960 | EPI2865958 | EPI2865962 | EPI2865955 | EPI2865961 | EPI2865957 | EPI2865956 |
| A/Yunnan-Hongta/11149/2022      | EPI_ISL_18681344 | EPI2865967 | EPI2865968 | EPI2865966 | EPI2865970 | EPI2865963 | EPI2865969 | EPI2865965 | EPI2865964 |
| A/Yunnan-Lushui/1989/2022       | EPI_ISL_18681345 | EPI2865975 | EPI2865976 | EPI2865974 | EPI2865978 | EPI2865971 | EPI2865977 | EPI2865973 | EPI2865972 |
| A/Yunnan-Hongta/11025/2022      | EPI_ISL_18681346 | EPI2865983 | EPI2865984 | EPI2865982 | EPI2865986 | EPI2865979 | EPI2865985 | EPI2865981 | EPI2865980 |
| A/Yunnan-Wenshan/1633/2022      | EPI_ISL_18681347 | EPI2865991 | EPI2865992 | EPI2865990 | EPI2865994 | EPI2865987 | EPI2865993 | EPI2865989 | EPI2865988 |
| A/Yunnan-Wenshan/1710/2022      | EPI_ISL_18681348 | EPI2865999 | EPI2866000 | EPI2865998 | EPI2866002 | EPI2865995 | EPI2866001 | EPI2865997 | EPI2865996 |
| A/Yunnan-Wuhua/1909/2022        | EPI_ISL_18681349 | EPI2866007 | EPI2866008 | EPI2866006 | EPI2866010 | EPI2866003 | EPI2866009 | EPI2866005 | EPI2866004 |
| A/Yunnan-Xianggelila/1928/2022  | EPI_ISL_18681350 | EPI2866015 | EPI2866016 | EPI2866014 | EPI2866018 | EPI2866011 | EPI2866017 | EPI2866013 | EPI2866012 |
| A/Yunnan-Xianggelila/1944/2022  | EPI_ISL_18681351 | EPI2866023 | EPI2866024 | EPI2866022 | EPI2866026 | EPI2866019 | EPI2866025 | EPI2866021 | EPI2866020 |
| A/Yunnan-Xianggelila/387/2022   | EPI_ISL_18681352 | EPI2866031 | EPI2866032 | EPI2866030 | EPI2866034 | EPI2866027 | EPI2866033 | EPI2866029 | EPI2866028 |
| A/Yunnan-Xianggelila/11226/2022 | EPI_ISL_18681353 | EPI2866039 | EPI2866040 | EPI2866038 | EPI2866042 | EPI2866035 | EPI2866041 | EPI2866037 | EPI2866036 |
| A/Yunnan-Xianggelila/11239/2022 | EPI_ISL_18681354 | EPI2866047 | EPI2866048 | EPI2866046 | EPI2866050 | EPI2866043 | EPI2866049 | EPI2866045 | EPI2866044 |
| A/Yunnan-Xianggelila/11216/2022 | EPI_ISL_18681355 | EPI2866055 | EPI2866056 | EPI2866054 | EPI2866058 | EPI2866051 | EPI2866057 | EPI2866053 | EPI2866052 |
| A/Texas/50/2012                 | EPI_ISL_16701302 | EPI2318459 | EPI2318460 | EPI2318461 | EPI2318462 | EPI2318463 | EPI2318464 | EPI2318465 | EPI2318466 |
| A/Hong Kong/4801/2014           | EPI_ISL_202569   | EPI696096  | EPI675796  | EPI696095  | EPI675798  | EPI675793  | EPI675797  | EPI675795  | EPI675794  |
| A/Singapore/INFIMH-16-0019/2016 | EPI_ISL_296168   | EPI1164033 | EPI1164034 | EPI1164032 | EPI1164036 | EPI1164029 | EPI1164035 | EPI1164031 | EPI1164030 |

|                            |                 |            |            |            |            |            |            |            |            |
|----------------------------|-----------------|------------|------------|------------|------------|------------|------------|------------|------------|
| A/Kansas/14/2017           | EPI_ISL_298310  | EPI1174040 | EPI117404  | EPI1174039 | EPI1174043 | EPI1174036 | EPI1174042 | EPI1174038 | EPI1174037 |
| A/Hong Kong/45/2019        | EPI_ISL_347938  | EPI1395763 | EPI1397374 | EPI1397373 | EPI1397376 | EPI1395762 | EPI1397375 | EPI1397372 | EPI1397371 |
| A/Cambodia/e0826360/2020   | EPI_ISL_710475  | EPI1841681 | EPI1841682 | EPI1841680 | EPI1837753 | EPI1841678 | EPI1837752 | EPI1837751 | EPI1841679 |
| A/Darwin/6/2021            | EPI_ISL_5332906 | EPI1922119 | EPI1922120 | EPI1922118 | EPI1922122 | EPI1922115 | EPI1922121 | EPI1922117 | EPI1922116 |
| A/California/18/2014       | EPI_ISL_167918  | EPI547787  | EPI547788  | EPI547786  | EPI547790  | EPI547783  | EPI547789  | EPI547785  | EPI547784  |
| A/Switzerland/9715293/2013 |                 | OQ350029   | OQ350030   | OQ350031   | OQ350032   | OQ350033   | OQ350034   | OQ350035   | OQ350036   |
| A/Newcastle/184/2017       |                 | MN569638   | MN569637   | MN569636   | MN569631   | MN569634   | MN569633   | MN569632   | MN569635   |
| A/New York/PV37/2017       |                 | MH798605   | MH798604   | MH798603   | MH798598   | MH798601   | MH798600   | MH798599   | MH798602   |
| A/Switzerland/8060/2017    |                 | OQ350846   | OQ350847   | OQ350848   | OQ350849   | OQ350850   | OQ350851   | OQ350852   | OQ350853   |
| A/Thailand/B29296/2018     |                 | MN561350   | MN561351   | MN561352   | MN561353   | MN561354   | MN561355   | MN561356   | MN561357   |
| A/Victoria/829/2017        |                 | MN574190   | MN574189   | MN574188   | MN574183   | MN574186   | MN574185   | MN574184   | MN574187   |
| A/Newcastle/4/2018         |                 | MN569798   | MN569797   | MN569796   | MN569791   | MN569794   | MN569793   | MN569792   | MN569795   |
| A/Perth/352/2017           |                 | MN570222   | MN570221   | MN570220   | MN570215   | MN570218   | MN570217   | MN570216   | MN570219   |
| A/South Australia/149/2017 |                 | MN570550   | MN570549   | MN570548   | MN570543   | MN570546   | MN570545   | MN570544   | MN570547   |
| A/Thailand/B24666/2017     |                 | MN561330   | MN561331   | MN561332   | MN561333   | MN561334   | MN561335   | MN561336   | MN561337   |
| A/South Australia/34/2019  | EPI_ISL_398939  | EPI1631899 | EPI1631900 | EPI1631898 | EPI1631902 | EPI1631895 | EPI1631901 | EPI1631897 | EPI1631896 |
| A/North Dakota/38/2018     |                 | MK363363   | MK265457   | MK265458   | MK265459   | MK265460   | MK265461   | MK265462   | MK265463   |
| A/Minnesota/41/2019        |                 | MN372908   | MN372909   | MN372910   | MN372911   | MN372912   | MN372913   | MN372914   | MN372915   |
| A/Washington/47/2022       |                 | OQ234824   | OQ234825   | OQ234826   | OQ234827   | OQ234828   | OQ234829   | OQ234830   | OQ234831   |

Abbreviations: PB2, polymerase basic 2; PB1, polymerase basic 1; PA, polymerase acid; HA, hemagglutinin; NP, nucleocapsid protein; NA, neuraminidase; M, matrix protein; NS, nonstructural protein.
