# Supplementary material for: Genomic Analyses Uncover Evolutionary Features of Influenza A/H3N2 Viruses in Yunnan Province, China, from 2017 to 2022
Source: MDPI journal article supplement (doi:10.3390/v16010138), 2024-01-18
Supplement: s1 [file s1]

**Table S2.** The number (%) of influenza strains isolated from samples of influenza-like cases in Yunnan Province, China, from 2017 to 2022.

| Year              | Number of samples tested | Number (%) of isolated strains |             |            |                   |
|-------------------|--------------------------|--------------------------------|-------------|------------|-------------------|
|                   |                          | Type A                         |             | Type B     | Total (each year) |
|                   |                          | A/H3N2                         | A/H1N1      |            |                   |
| 2017              | 22721                    | 865 (3.81)                     |             | 475(2.10)  | 1340(5.90)        |
|                   |                          | 366 (42.31)                    | 499 (57.69) |            |                   |
| 2018              | 22294                    | 865 (3.88)                     |             | 277(1.24)  | 1142(5.12)        |
|                   |                          | 70 (8.09)                      | 795 (91.91) |            |                   |
| 2019              | 22700                    | 1004 (4.42)                    |             | 346(1.52)  | 1350(5.95)        |
|                   |                          | 504 (50.20)                    | 500 (49.80) |            |                   |
| 2020              | 19780                    | 191 (0.97)                     |             | 45(0.23)   | 236(1.19)         |
|                   |                          | 79 (41.36)                     | 112 (58.64) |            |                   |
| 2021              | 26292                    | 9 (0.03)                       |             | 303(1.15)  | 312(1.19)         |
|                   |                          | 8 (88.89)                      | 1 (11.11)   |            |                   |
| 2022              | 23209                    | 345 (1.49)                     |             | 366(1.58)  | 711(3.06)         |
|                   |                          | 345 (100.00)                   | 0 (0.00)    |            |                   |
| Total (all years) | 136996                   | 3279 (2.39)                    |             | 1812(1.32) | 5091(3.72)        |
|                   |                          | 1372(41.84)                    | 1907(58.16) |            |                   |
